# Supplementary material for: Molecular Survey on A, B, C and New Avian Metapneumovirus (aMPV) Subtypes in Wild Birds of Northern-Central Italy
Source: MDPI journal article supplement (doi:10.3390/vetsci9070373), 2022-07-20
Supplement: s1 [file s1]

Supplementary Table S1: database of avian and human Metapneumovirus sequences of the M gene downloaded from GenBank and/or previously obtained, with identification, host, accession number, collection year and country.

| <i>Virus</i>  | <i>Strain</i> | <i>Acc. Num.</i> | <i>Country</i> | <i>Year</i> | <i>Host</i> | <i>Identification</i>         |
|---------------|---------------|------------------|----------------|-------------|-------------|-------------------------------|
| <i>aMPV-C</i> | 6264-41       | ON457995         | Italy          | 2018        | Mallard     | aMPV/C/IT/Mallard/6264-41/18  |
| <i>aMPV-C</i> | 758/07        | OM021855         | Italy          | 2007        | Wigeon      | aMPV/C/IT/Wigeon/758/07       |
| <i>aMPV-C</i> | 470/02        | FJ195344         | USA            | 2002        | Goose       | aMPV/C/USA/Goose/470/02       |
| <i>aMPV-C</i> | 36/01         | FJ195333.1       | USA            | 2001        | Coot        | aMPV/C/USA/Coot/36/01         |
| <i>aMPV-C</i> | 2a            | FJ977568.1       | USA            | 2009        | Turkey      | aMPV/C/USA/Turkey/2a/97       |
| <i>aMPV-C</i> | 144/01        | FJ195337.1       | USA            | 2001        | Coot        | aMPV/C/USA/Coot/144/01        |
| <i>aMPV-C</i> | 45/01         | FJ195334.1       | USA            | 2001        | Coot        | aMPV/C/USA/Coot/45/01         |
| <i>aMPV-C</i> | PL/2          | EF199772.1       | Korea          | 2007        | Pheasant    | aMPV/C/Korea/Pheasant/PL-2/07 |
| <i>aMPV-C</i> | PL/1          | EF199771.1       | Korea          | 2007        | Pheasant    | aMPV/C/Korea/Pheasant/PL-1/07 |
| <i>aMPV-C</i> | APV/CO        | AY579780.1       | USA            | 1998        | Turkey      | aMPV/C/USA/Turkey/APV-CO/98   |
| <i>aMPV/C</i> | aMPV/CO       | AY590688.1       | USA            | 1996        | Turkeys     | aMPV/C/USA/aMPV-CO            |
| <i>aMPV-C</i> | Sparrow       | AF266674.1       | USA            | 2000        | Sparrow     | aMPV/C/USA/Sparrow/00         |
| <i>aMPV/C</i> |               | AF262571.1       | USA            |             |             | aMPV/C/AF262571.1             |
| <i>aMPV/C</i> | Mn1b          | AF262569.1       | USA            |             |             | aMPV/C/USA/MN1b               |
| <i>aMPV-C</i> | 04            | DQ009484.1       | USA            | 2001        | Goose       | aMPV/C/USA/Goose/04           |
| <i>aMPV/C</i> | Mn1a          | AF187149.1       | USA            |             |             | aMPV/C/USA/MN1a               |
| <i>aMPV/C</i> | 225/01        | FJ195340.1       | USA            | 2001        | Goose       | aMPV/C/USA/Goose/225/01       |
| <i>aMPV/C</i> | 98/01         | FJ195336.1       | USA            | 2001        | Coot        | aMPV/C/USA/Coot/98/01         |
| <i>aMPV/C</i> | 56/01         | FJ195335.1       | USA            | 2001        | Coot        | aMPV/C/USA/Coot/56/01         |
| <i>aMPV-C</i> | 35/01         | FJ195332.1       | USA            | 2001        | Coot        | aMPV/C/USA/Coot/35/01         |
| <i>aMPV/C</i> | MN6           | AF298636.1       | USA            | 1999        | Turkey      | aMPV/C/USA/Turkey/MN6/99      |
| <i>aMPV/C</i> | MN7           | AF298635.1       | USA            | 1999        | Turkey      | aMPV/C/USA/Turkey/MN7/99      |
| <i>aMPV/C</i> | MN9           | AF298633.1       | USA            | 1999        | Turkey      | aMPV/C/USA/Turkey/MN9/99      |
| <i>aMPV/C</i> | 146/01        | FJ195338.1       | USA            | 2001        | Coot        | aMPV/C/USA/Coot/146/01        |
| <i>aMPV/C</i> | MN4a          | AF298641.1       | USA            | 1999        | Turkey      | aMPV/C/USA/turkey/MN4A/99     |
| <i>aMPV/C</i> | MN4C          | AF298640.1       | USA            | 1999        | Turkey      | aMPV/C/USA/Turkey/MN4C/99     |
| <i>aMPV/C</i> | MN11          | AF298637.1       | USA            | 1999        | Turkey      | aMPV/C/USA/Turkey/MN11/99     |

|                |            |                             |             |      |                         |                                      |
|----------------|------------|-----------------------------|-------------|------|-------------------------|--------------------------------------|
| <i>aMPV/C</i>  | MN8        | AF298634.1                  | USA         | 1999 | Turkey                  | aMPV/C/USA/Turkey/MN8/99             |
| <i>aMPV-C</i>  | Duck       | AF266673                    | USA         | 2000 | Duck                    | aMPV/C/USA/Duck/00                   |
| <i>aMPV/C</i>  | MN2a       | AF187151.1                  | USA         | 1997 | Turkey                  | aMPV/C/USA/Turkey/MN2A/97            |
| <i>aMPV/C</i>  | 228/01     | FJ195341.1                  | USA         | 2001 | Goose                   | aMPV/C/USA/Goose/228/01              |
| <i>aMPV/C</i>  | MN4b       | AF298639.1                  | USA         | 1999 | Turkey                  | aMPV/C/USA/Turkey/MN4B/99            |
| <i>aMPV-C</i>  | Goose      | AF266675.1                  | USA         | 2000 | Goose                   | aMPV/C/USA/Goose/00                  |
| <i>aMPV/C</i>  | Georgia/02 | FJ195345.1                  | USA         | 2002 | Goose                   | aMPV/C/USA/Goose/02                  |
| <i>aMPV/C</i>  | 322/01     | FJ195343.1                  | USA         | 2001 | Goose                   | aMPV/C/USA/Goose/322/01              |
| <i>aMPV/C</i>  | 148/01     | FJ195339.1                  | USA         | 2001 | Coot                    | aMPV/C/USA/Coot/148/01               |
| <i>aMPV/C</i>  | MN-12      | AF368171.1                  | USA         |      | Duck                    | aMPV/C/USA/Duck/MN-12                |
| <i>aMPV-C</i>  | 239        | FJ195342.1                  | USA         | 2001 | Goose                   | aMPV/C/USA/Goose/239/01              |
| <i>aMPV/C</i>  | 32/01      | FJ195331.1                  | USA         | 2001 | Coot                    | aMPV/C/USA/Coot/32/01                |
| <i>aMPV/C</i>  | 24/01      | FJ195329.1                  | USA         | 2001 | Coot                    | aMPV/C/USA/Coot/24/01                |
| <i>aMPV/C</i>  | MN10       | AF298638.1                  | USA         | 1999 | Turkey                  | aMPV/C/USA/Turkey/MN10/99            |
| <i>aMPV/C</i>  | 26/01      | FJ195330.1                  | USA         | 2001 | Coot                    | aMPV/C/USA/Coot/26/01                |
| <i>aMPV-C</i>  | 99178      | HG934338.1                  | France      | 1999 | Duck                    | aMPV/C/FR/MuscovyDuck/99178/99       |
| <i>aMPV-C</i>  | S01        | KF364615                    | China       | 2001 | Duck                    | aMPV/C/China/Duck/S01/11             |
| <i>aMPV-C</i>  | GDY        | KC915036.1                  | China       | 2011 | Duck                    | aMPV/C/China/GDY/11                  |
| <i>aMPV-C</i>  | JC         | JX422020.1                  | China       | 2012 | Chicken                 | aMPV/C/China/Ck/JC/12                |
| <i>aMPV/C</i>  | MN5        | AF298651.1                  | USA         | 1999 | Turkey                  | aMPV/C/USA/Turkey/MN5/99             |
| <i>aMPV-A</i>  | 8544       | DQ666911.1                  | Italy       | 2006 |                         | aMPV/A/IT/8544/06                    |
| <i>aMPV-B</i>  | Vr240      | (Courtesy of Prof. Catelli) | Italy       | 1987 | Turkey                  | aMPV/B/IT/Ty/Vr240/87                |
| <i>aMPV-D</i>  | 85035      | HG934339.1                  | France      | 1985 | Turkey                  | aMPV/D/FR/Ty/85035/85                |
| <i>hMPV-A1</i> | 00/1       | AF371337.2                  | Netherlands | 2001 | Human                   | hMPV/A1/NL/Human/00-1/01             |
| <i>hMPV-A2</i> | NL/00/17   | FJ168779.1                  | Netherlands | 2000 | Human                   | hMPV/A2/NL/Human/NL-00-17/00         |
| <i>hMPV-B1</i> | NL/1/99    | AY525843.1                  | Netherlands | 1999 | Human                   | hMPV/B1/NL/Human/NL-1-99/99          |
| <i>hMPV-B2</i> | NL/94/01   | FJ168778.1                  | Netherlands | 1994 | Human                   | hMPV/B2/NL/Human/NL-94-01/94         |
| <i>GuMPV</i>   | B29        | MN175553.1                  | Canada      | 2015 | Great black beaked gull | GuMPV/C/USA/Duck/MN-12               |
| <i>PAR-MPV</i> | PAR-05     | MK491499.1                  | USA         | 2018 | Monk Parakeet           | PAR-MPV/USA/MonkParakeet/PAR-05/2018 |

Supplementary Table S2: database of avian and human Metapneumovirus sequences of the G gene downloaded from GenBank and/or previously obtained, with identification, host, accession number, collection year and country.

| <i>Virus</i>   | <i>Strain</i> | <i>Acc. Num.</i> | <i>Country</i> | <i>Year</i> | <i>Host</i>             | <i>Identification</i>                          |
|----------------|---------------|------------------|----------------|-------------|-------------------------|------------------------------------------------|
| <i>aMPV-C</i>  | 6264-41       | ON457994         | Italy          | 2018        | Mallard                 | aMPV/C/IT/Mallard/6264-41/18                   |
| <i>aMPV-C</i>  | 758/07        | OM021856         | Italy          | 2007        | Wigeon                  | aMPV/C/IT/Wigeon/758/07                        |
| <i>aMPV-C</i>  | 99178         | HG934338.1       | France         | 1999        | Duck                    | aMPV/C/FR/MuscovyDuck/99178/99                 |
| <i>aMPV-C</i>  | 99350         | AJ811992.1       | France         | 1999        | Muscovy duck            | aMPV/C/FR/MuscovyDuck/99350/99                 |
| <i>aMPV-C</i>  | 00094         | AJ811993.1       | France         | 1999        | White Pekin duck        | aMPV/C/FR/ WhitePekinDuck/00094/99             |
| <i>aMPV-C</i>  | GDY           | KC915036.1       | China          | 2011        | Duck                    | aMPV/C/China/GDY/11                            |
| <i>aMPV-C</i>  | S01           | KF364615.2       | China          | 2011        | Muscovy duck            | aMPV/C/China/MuscovyDuck/S01/11                |
| <i>aMPV-C</i>  | 15a/01        | GU126687.1       | USA            | 2001        | Canada goose            | aMPV/C/USA/CanadaGoose/15a/01                  |
| <i>aMPV-C</i>  | Mn-2a         | AY590693.1       | USA            | 1997        | Turkey                  | aMPV/C/USA/Turkey/MN2A/97                      |
| <i>aMPV-C</i>  | Mn1a          | AY590692.1       | USA            |             |                         | aMPV/C/USA/MN1a                                |
| <i>aMPV-C</i>  | PL/2          | EF199772.1       | Korea          | 2007        | Pheasant                | aMPV/C/Korea/Pheasant/PL-2/07                  |
| <i>aMPV-C</i>  | PL/1          | EF199771.1       | Korea          | 2007        | Pheasant                | aMPV/C/Korea/Pheasant/PL-1/07                  |
| <i>aMPV-C</i>  | Colorado      | AY590691.1       | USA            |             | Turkey                  | aMPV/C/USA/Turkey/Colorado                     |
| <i>aMPV/C</i>  | aMPV/CO       | AY590688.1       | USA            | 1996        | Turkeys                 | aMPV/C/USA/aMPV-CO                             |
| <i>aMPV-A</i>  | 8544          | DQ666911.1       | Italy          | 2006        |                         | aMPV/A/IT/8544/06                              |
| <i>aMPV-B</i>  | 657           | MN729604         | Hungary        | 1989        | Turkey                  | aMPV/B/Hungary/Turkey/657-4/89                 |
| <i>aMPV-D</i>  | 85035         | HG934339.1       | France         | 1985        | Turkey                  | aMPV/D/FR/Ty/85035/85                          |
| <i>hMPV-A1</i> | 00/1          | AF371337.2       | Netherlands    | 2001        | Human                   | hMPV/A1/NL/Human/00-1/01                       |
| <i>hMPV-A2</i> | NL/00/17      | FJ168779.1       | Netherlands    | 2000        | Human                   | hMPV/A2/NL/Human/NL-00-17/00                   |
| <i>hMPV-B1</i> | NL/1/99       | AY525843.1       | Netherlands    | 1999        | Human                   | hMPV/B1/NL/Human/NL-1-99/99                    |
| <i>hMPV-B2</i> | NL/94/01      | FJ168778.1       | Netherlands    | 1994        | Human                   | hMPV/B2/NL/Human/NL-94-01/94                   |
| <i>PAR-MPV</i> | PAR-05        | MK491499.1       | USA            | 2018        | Monk Parakeet           | aMPV/PAR-MPV/USA/MonkParakeet/PAR-05/2018      |
| <i>GuMPV</i>   | B29           | MN175553.1       | Canada         | 2015        | Great black beaked gull | aMPV/GuMPV/Canada/ GreatBlackBeakedGull/B29/15 |
